# Supplementary material
Source: PubMed Central journal article supplement (PMC6679771)
Supplement: NIHMS1531560-supplement-1.pdf [file NIHMS1531560-supplement-1.pdf]

## SUPPLEMENTARY FIGURES

(Incidence of Ductal Carcinoma in Situ in the United States, 2000-2014, Ryser et al.)

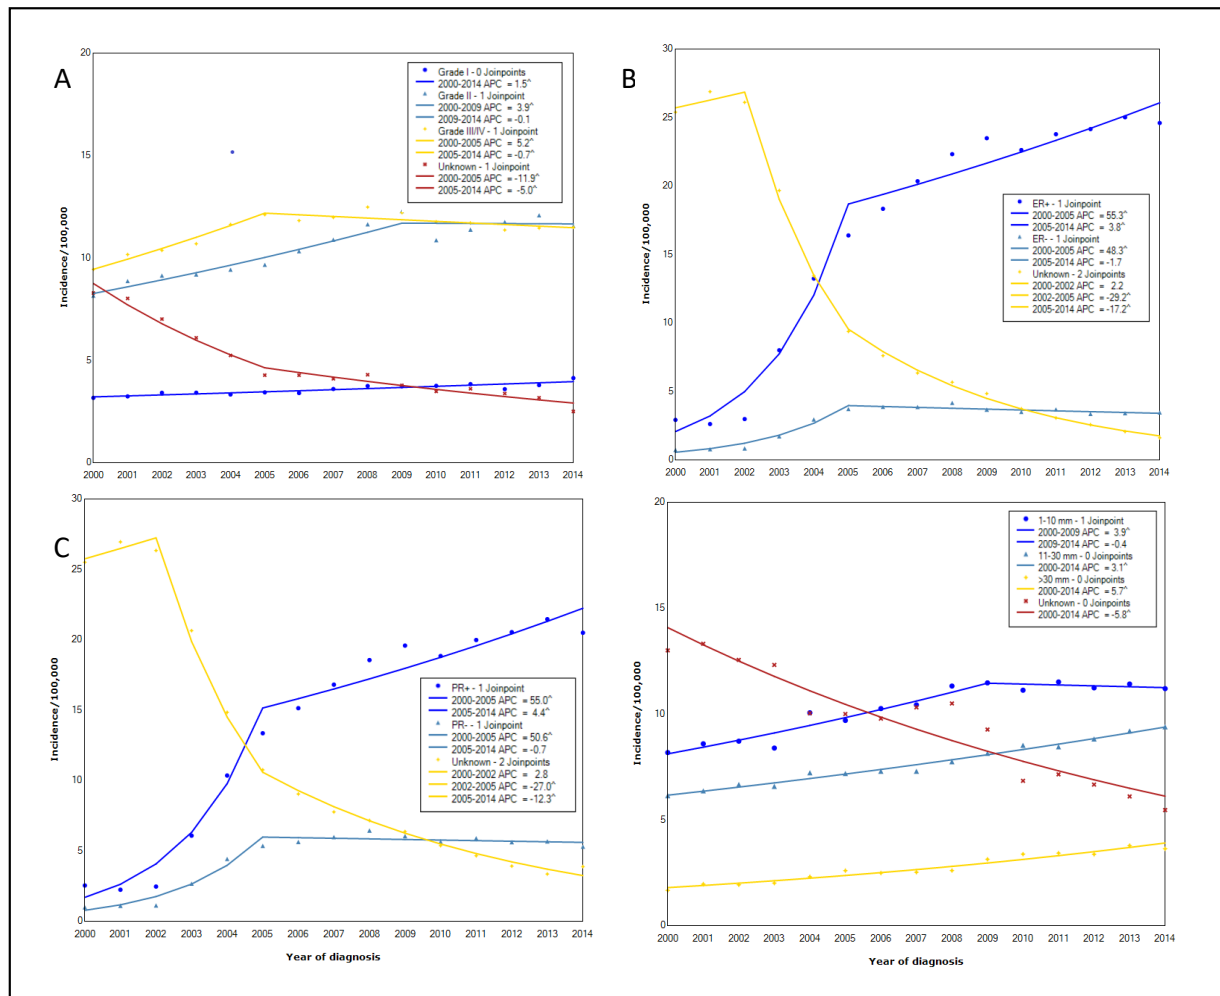

**Figure S1: Age-adjusted ductal carcinoma in situ (DCIS) incidence trends, by grade (A), estrogen receptor (ER) status (B), progesterone (PR) status (C) and tumor size (D), 2000-2014.**
