# Supplementary material
Source: PubMed Central journal article supplement (PMC6679771)
Supplement: NIHMS1531560-supplement-2.pdf [file NIHMS1531560-supplement-2.pdf]

## **SUPPLEMENTARY MATERIALS**

*(Incidence of Ductal Carcinoma in Situ in the United States, 2000-2014, Ryser et al.)*

### **ICD-0-3 histology codes included in the study:**

8050/2: Papillary carcinoma in situ  
8140/2: Adenocarcinoma in situ, NOS  
8200/2: Adenoid cystic carcinoma in situ  
8201/2: Cribriform carcinoma in situ  
8211/2: Tubular adenocarcinoma in situ  
8230/2: Ductal carcinoma in situ, solid type  
8246/2: Neuroendocrine carcinoma in situ  
8260/2: Papillary adenocarcinoma in situ, NOS  
8343/2: Papillary carcinoma, encapsulated, in situ  
8401/2: Apocrine adenocarcinoma in situ  
8480/2: Mucinous adenocarcinoma in situ  
8481/2: Mucin-producing adenocarcinoma in situ  
8490/2: Signet ring cell carcinoma in situ  
8500/2: Intraductal carcinoma, noninfiltrating, NOS  
8501/2: Comedocarcinoma, noninfiltrating  
8503/2: Noninfiltrating intraductal papillary adenocarcinoma  
8504/2: Noninfiltrating intracystic carcinoma  
8507/2: Intraductal micropapillary carcinoma  
8508/2: Cystic hypersecretory carcinoma, in situ  
8521/2: Ductular carcinoma in situ  
8522/2: Intraductal and lobular in situ carcinoma  
8523/2: Intraductal with other types of carcinoma in situ  
8543/2: Paget disease in situ and intraductal carcinoma  
8550/2: Acinar cell carcinoma in situ
