# Supplementary material
Source: PubMed Central journal article supplement (PMC6679771)
Supplement: NIHMS1531560-supplement-3.pdf [file NIHMS1531560-supplement-3.pdf]

**SUPPLEMENTARY TABLES**

*(Incidence of Ductal Carcinoma in Situ in the United States, 2000-2014, Ryser et al.)*

|                                                    | <b>2000-03</b><br><b>N=26,003</b> | %    | <b>2004-07</b><br><b>N=31,638</b> | %    | <b>2008-11</b><br><b>N=36,708</b> | %    | <b>2012-14</b><br><b>N=28,932</b> | %    | <b>Total</b><br><b>N=123,281</b> | %    | <b>p-value***</b> |
|----------------------------------------------------|-----------------------------------|------|-----------------------------------|------|-----------------------------------|------|-----------------------------------|------|----------------------------------|------|-------------------|
| <b>Known tumor grade</b>                           |                                   |      |                                   |      |                                   |      |                                   |      |                                  |      | <0.001            |
| Grade I                                            | 3,854                             | 14.8 | 4,282                             | 13.5 | 5,081                             | 13.8 | 4,142                             | 14.3 | 17,359                           | 14.1 |                   |
| Grade II                                           | 10,301                            | 39.6 | 12,553                            | 39.7 | 15,450                            | 42.1 | 12,558                            | 43.4 | 50,862                           | 41.3 |                   |
| Grade III/IV                                       | 11,848                            | 45.6 | 14,803                            | 46.8 | 16,177                            | 44.1 | 12,232                            | 42.3 | 55,060                           | 44.7 |                   |
|                                                    | <b>2000-03</b><br><b>N=6,055</b>  | %    | <b>2004-07</b><br><b>N=25,797</b> | %    | <b>2008-11</b><br><b>N=35,990</b> | %    | <b>2012-14</b><br><b>N=29,918</b> | %    | <b>Total</b><br><b>N=97,760</b>  | %    | <b>p-value***</b> |
| <b>Known ER status</b>                             |                                   |      |                                   |      |                                   |      |                                   |      |                                  |      | <0.001            |
| Positive                                           | 4,857                             | 80.2 | 21,276                            | 82.5 | 30,865                            | 85.8 | 26,170                            | 87.5 | 83,168                           | 85.1 |                   |
| Negative                                           | 1,198                             | 19.8 | 4,521                             | 17.5 | 5,125                             | 14.2 | 3,748                             | 12.5 | 14,592                           | 14.9 |                   |
|                                                    | <b>2000-03</b><br><b>N=5,640</b>  | %    | <b>2004-07</b><br><b>N=24,046</b> | %    | <b>2008-11</b><br><b>N=33,888</b> | %    | <b>2012-14</b><br><b>N=28,170</b> | %    | <b>Total</b><br><b>N=91,744</b>  | %    | <b>p-value***</b> |
| <b>Known PR status</b>                             |                                   |      |                                   |      |                                   |      |                                   |      |                                  |      | <0.001            |
| Positive                                           | 3,909                             | 69.3 | 17,314                            | 72.0 | 25,676                            | 75.8 | 22,062                            | 78.3 | 6,8961                           | 75.2 |                   |
| Negative                                           | 1,731                             | 30.7 | 6,732                             | 28.0 | 8,212                             | 24.2 | 6,108                             | 21.7 | 22,783                           | 24.8 |                   |
|                                                    | <b>2000-03</b><br><b>N=19,579</b> | %    | <b>2004-07</b><br><b>N=24,694</b> | %    | <b>2008-11</b><br><b>N=30,499</b> | %    | <b>2012-14</b><br><b>N=25,667</b> | %    | <b>Total</b><br><b>N=100,439</b> | %    | <b>p-value***</b> |
| <b>Known tumor size</b>                            |                                   |      |                                   |      |                                   |      |                                   |      |                                  |      | <0.001            |
| 1-10mm                                             | 9,865                             | 50.4 | 12,612                            | 51.1 | 15,305                            | 50.2 | 12,144                            | 47.3 | 49,926                           | 49.7 |                   |
| 11-30mm                                            | 7,510                             | 38.4 | 9,027                             | 36.6 | 11,038                            | 36.2 | 9,776                             | 38.1 | 37,351                           | 37.2 |                   |
| >=30mm                                             | 2,204                             | 11.3 | 3,055                             | 12.4 | 4,156                             | 13.6 | 3,747                             | 14.6 | 13,162                           | 13.1 |                   |
|                                                    | <b>2000-03</b><br><b>N=4,563</b>  | %    | <b>2004-07</b><br><b>N=21942</b>  | %    | <b>2008-11</b><br><b>N=31,284</b> | %    | <b>2012-14</b><br><b>N=26,552</b> | %    | <b>Total</b><br><b>N=84,341</b>  | %    | <b>p-value***</b> |
| <b>Known tumor grade,<br/>ER and/or PR status*</b> |                                   |      |                                   |      |                                   |      |                                   |      |                                  |      | <0.001            |
| Low risk**                                         | 2,155                             | 47.2 | 10,780                            | 49.1 | 16,544                            | 52.9 | 14,762                            | 55.6 | 44,241                           | 52.5 |                   |
| Non-low risk                                       | 2,408                             | 52.8 | 11,162                            | 50.9 | 14,740                            | 47.1 | 11,790                            | 44.4 | 40,100                           | 47.5 |                   |

**Table S1: Tumor features in patients diagnosed between 2000 and 2014.** \*Restricted to age>=40 years \*\*Grade I/II, ER-positive and/or PR-positive \*\*\*Chi-square test
